# Supplementary material
Source: PubMed Central journal article supplement (PMC3942683)
Supplement: Supp_Fig1.pdf [file Supp_Fig1.pdf]

## Supplementary Data

### Evolutionary conserved C-terminal region of FUS Gene

---

|           |                                                      |
|-----------|------------------------------------------------------|
| Human     | R-G-E-H-R-Q-D- <b>R</b> -R-E-R-P-Y                   |
| Chimp     | R-G-E-H-R-Q-D- <b>R</b> -R-E-R-P-Y                   |
| Macaque   | R-G-E-H-R-Q-D- <b>R</b> -R-E-R-P-Y                   |
| Elephant  | R-G-E-H-R-Q-D- <b>R</b> -R-E-R-P-Y                   |
| Chick     | R-G-D-H-R-Q-D- <b>R</b> -R-E-R-P-Y                   |
| Cow       | R-G-E-H-R-Q-D- <b>R</b> -R-E-R-P-Y                   |
| Rat       | R-G-E-H-R-Q-D- <b>R</b> -R-E-R-P-Y                   |
| Mouse     | R-G-E-H-R-Q-D- <b>R</b> -R-E-R-P-Y                   |
| Dog       | R-G-E-H-R-Q-D- <b>R</b> -R-E-R-P-Y                   |
| Rabbit    | R-G-E-H-R-Q-D- <b>R</b> -R-E-R-P-Y                   |
| Zebrafish | R-G-D-H-R- <b>H</b> -D- <b>R</b> -R- <b>D</b> -R-P-Y |
| Xenopus   | R-G-D-H-R-Q-D- <b>R</b> -R- <b>D</b> -R-P-Y          |

---

SUPPLEMENTARY FIG. S1. Sequence alignment of C-terminal amino acids of Fused in sarcoma (FUS) from various species. The identical amino acids at position 521 highlighted in bold type.
