# Supplementary material
Source: PubMed Central journal article supplement (PMC3942683)
Supplement: Supp_Fig2.pdf [file Supp_Fig2.pdf]

**A CBB staining**

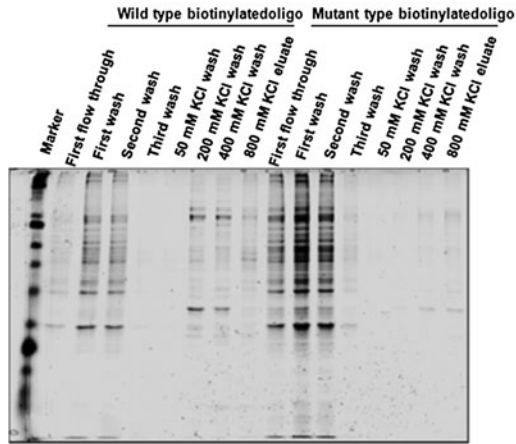

**B Purified FUS**

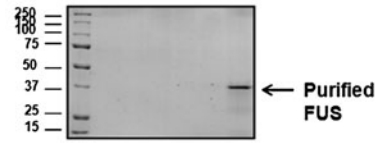

**C EMSA**

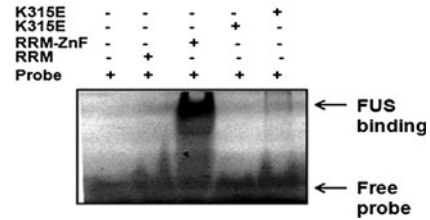

**SUPPLEMENTARY FIG. S2. Purified proteins and DNA binding.** (A) Proteins are purified by affinity chromatography and stained with Coomassie brilliant blue. (B) SDS-PAGE electrophoresis of purified truncated FUS protein. This recombinant protein corresponds to amino acids 262–526 of human FUS/TLS containing His-tag at the N-terminal region and the predicted size is 29 kDa as shown on the gel after Coomassie brilliant blue staining. (C) Electrophoretic mobility shift.
