# Supplementary material
Source: PubMed Central journal article supplement (PMC3942683)
Supplement: Supp_Fig3.pdf [file Supp_Fig3.pdf]

**A Wild probe**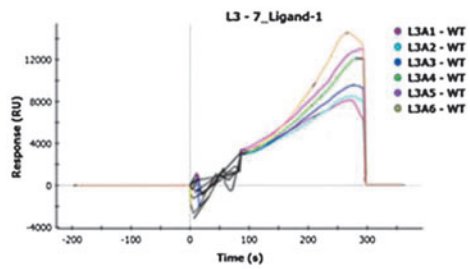**B Mutant probe**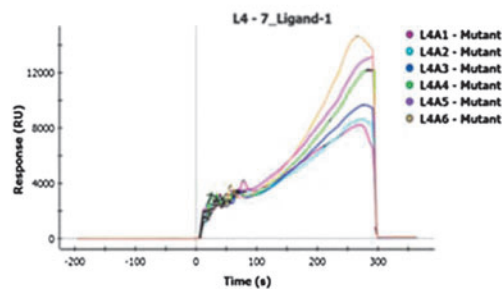**C**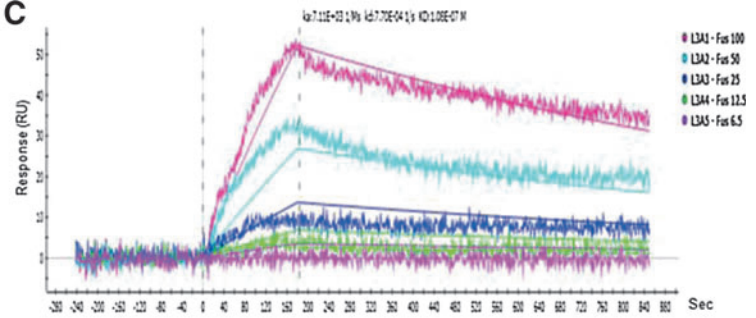**D**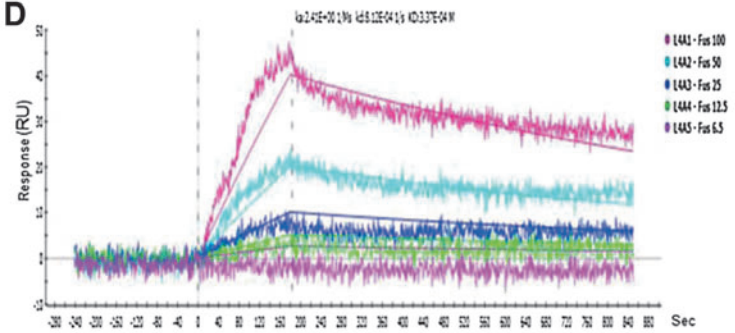

**SUPPLEMENTARY FIG. S3. Surface Plasmon Resonance (SPR) analysis of purified recombinant FUS binding.** Biotinylated oligonucleotide (obtained from the MnSOD promoter) binding to streptavidine in the sensor Chip for wild-type oligonucleotide (A), and mutant oligonucleotide (B). The equal binding of ligand with Streptavidine is shown in terms of response units (RU). The biotinylated oligo-nucleotides of wild-type (C) and mutant-type (D) probes binding to purified proteins are shown by SPR analysis.
