# Supplementary material
Source: PubMed Central journal article supplement (PMC3942683)
Supplement: Supp_Fig4.pdf [file Supp_Fig4.pdf]

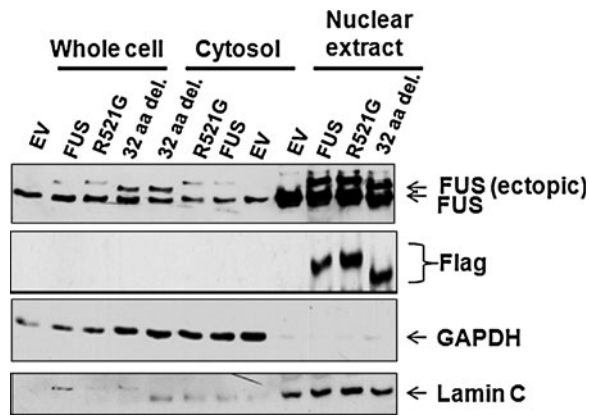

**SUPPLEMENTARY FIG. S4. Overexpressed FUS is present in the nucleus.** JB6 cells were transfected with wild-type FUS or mutant FUS cDNA and grown for 48 h. Cells were harvested; nuclear extracts were prepared in the presence of protease inhibitor and the cytosolic fractions were separated (9). Equal amounts of proteins were subjected to 10% SDS-PAGE and transferred to nitrocellulose membrane. Western blotting analysis was performed to identify FUS proteins in different cell fractions. The membranes were also probed with Flag antibody (1: 1000) to determine the levels of Flag-tagged FUS in the cellular fraction. The purity of nuclear fractions was assessed by probing the membrane with nuclear specific lamin C antibody (1:1000) and the GAPDH levels were used as loading control.
