# Supplementary material
Source: PubMed Central journal article supplement (PMC3942683)
Supplement: Supp_Fig5.pdf [file Supp_Fig5.pdf]

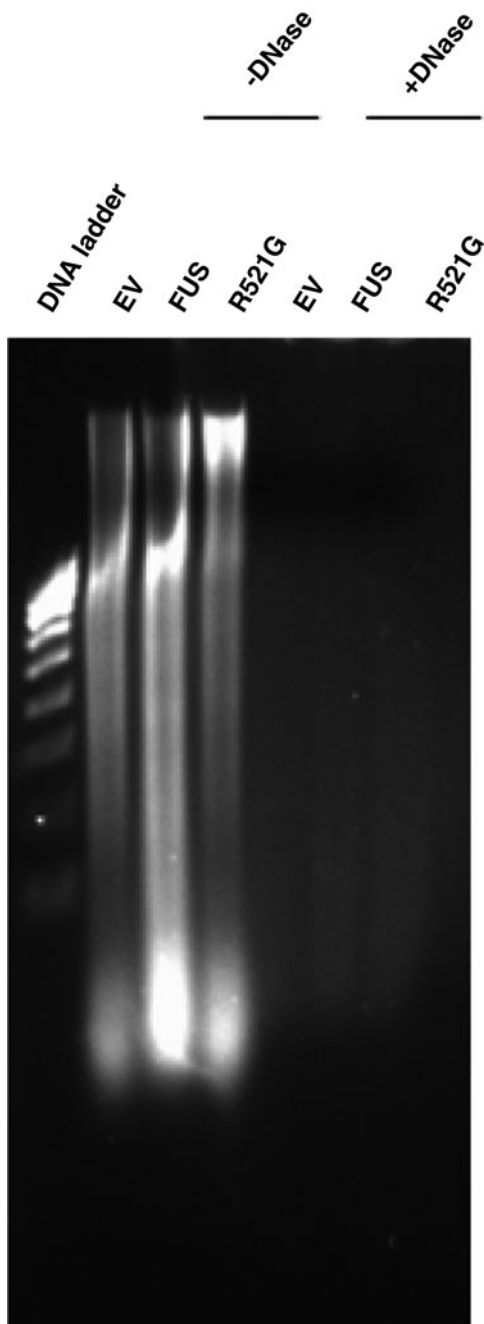

**SUPPLEMENTARY FIG. S5. Agarose gel electrophoresis of genomic DNA.** Genomic DNA was isolated for the cells after transfection of wild-type or mutant FUS expression vector. Cells were treated with DNase for 30 min, and the DNA samples were resolved in agarose gel electrophoresis.
