# Supplementary material
Source: PubMed Central journal article supplement (PMC3942683)
Supplement: Supp_Fig6.pdf [file Supp_Fig6.pdf]

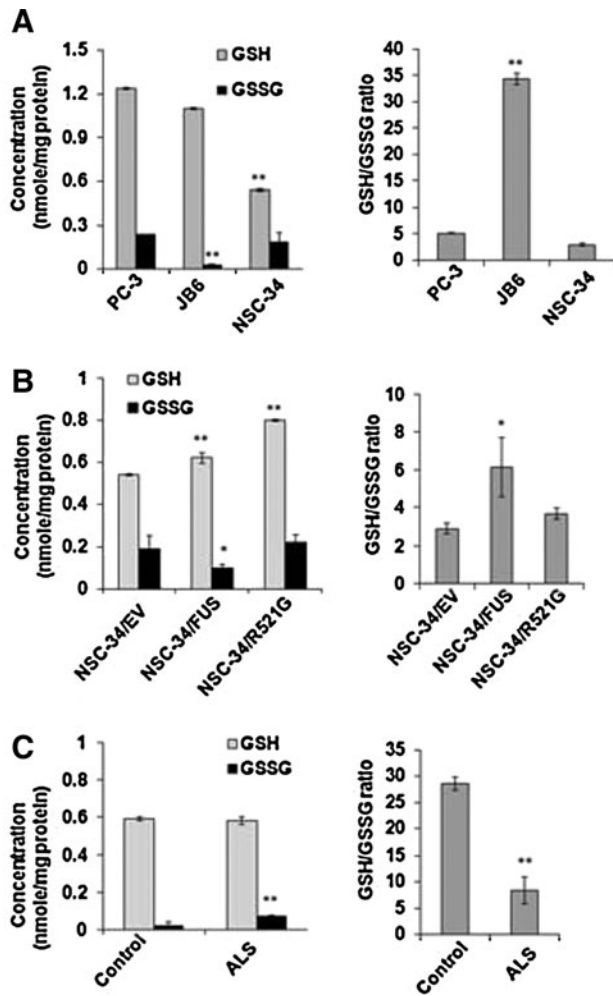

**SUPPLEMENTARY FIG. S6. Cellular glutathione levels.** Cells were harvested, lysed, and sonicated. The levels of glutathione (GSH) and oxidized glutathione (GSSG) were determined by the reverse phase High-performance liquid chromatography method and the ratios of GSH to GSSG were calculated. Intracellular glutathione concentrations were compared within the cell lines (**A**). Glutathione concentrations were estimated in NEC-34 cells after transfection of wild-type FUS or mutant FUS expression vector which are compared with the empty vector transfected control (**B**). Intracellular concentrations of glutathione were determined in skin fibroblast cells derived from fALS patients, who possess the R521G mutation and they were compared with the skin fibroblast cell line from normal subjects. Each data point represents the mean  $\pm$  SD of three independent samples. Significant difference as compared with corresponding control is indicated by \* $p < 0.05$ , \*\* $p < 0.01$ .
